# Supplementary material for: GC Analysis, Anticancer, and Antibacterial Activities of Secondary Bioactive Compounds from Endosymbiotic Bacteria of Pomegranate Aphid and Its Predator and Protector
Source: MDPI journal article supplement (doi:10.3390/molecules28104255), 2023-05-22
Supplement: s1 [file s1]

# GC Analysis, Anticancer, and Antibacterial Activities of Secondary Bioactive Compounds from Endosymbiotic Bacteria of Pomegranate Aphid and Its Predator and Protector

Taghreed Alsufyani <sup>1,2,\*</sup>, Najwa Al-Otaibi <sup>2,3</sup>, Noura J. Alotaibi <sup>2,3</sup>, Nour Houda M'sakni <sup>1,2,4</sup> and Eman M. Alghamdi <sup>5</sup>

<sup>1</sup> Department of Chemistry, College of Science, Taif University, P.O. Box 11099, Taif 21944, Saudi Arabia; nour.h@tu.edu.sa

<sup>2</sup> High Altitude Research Centre, Taif University, P.O. Box 11099, Taif 21944, Saudi Arabia; naotaibi@tu.edu.sa (N.A.-O.); n.alotaibi@tu.edu.sa (N.J.A.)

<sup>3</sup> Department of Biology, College of Science, Taif University, P.O. Box 11099, Taif 21944, Saudi Arabia

<sup>4</sup> Laboratory of the Interfaces and Advanced Materials (LIMA), Science Faculty, Monastir University, P.O. Box 05019, Monastir 5019, Tunisia

<sup>5</sup> Chemistry Department, Faculty of Science, King Abdul Aziz University, P.O. Box 80200, Jeddah 21589, Saudi Arabia; emalghamdi@kau.edu.sa

\* Correspondence: taghreed.alsufyani@tu.edu.sa

## Supplementary Figures

### 3 GC/MS figures

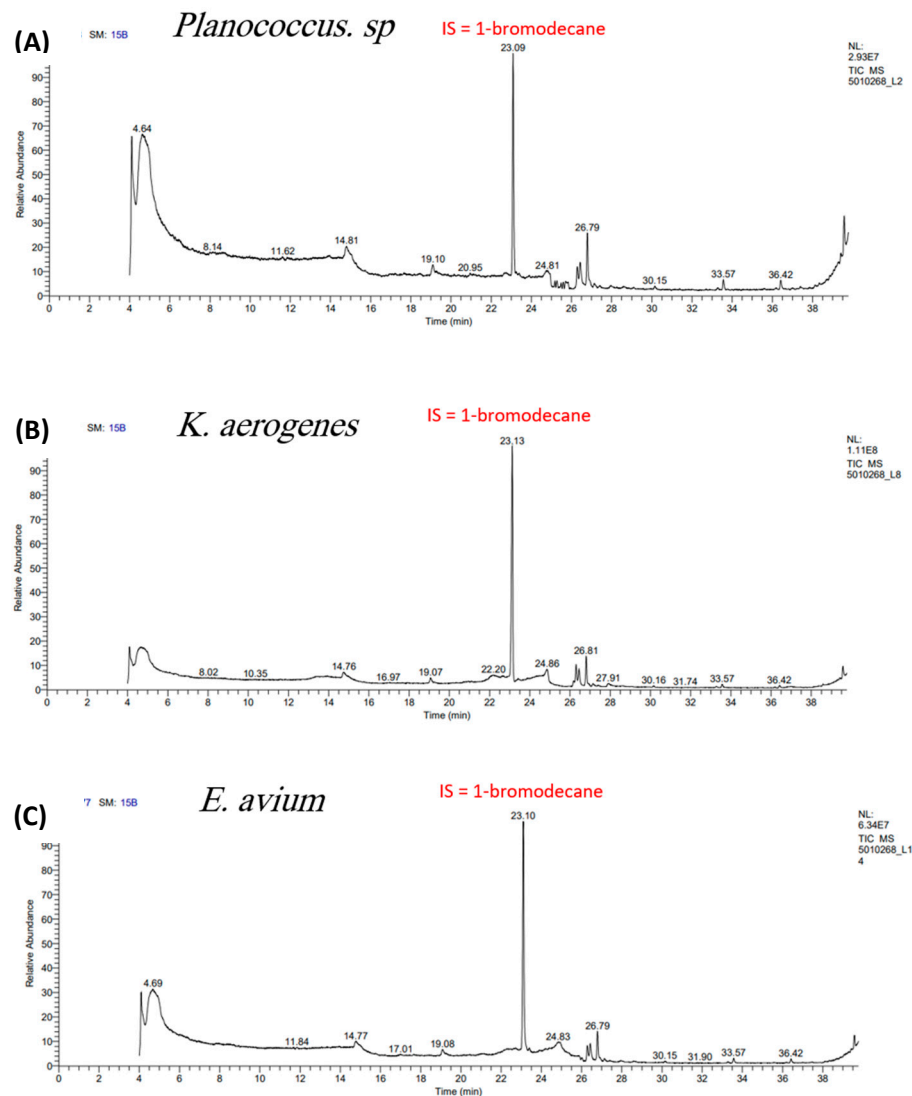

**Figure S1:** GC-MS chromatograms of bioactive compounds extracted from the ethyl acetate fraction of the following bacteria (A) *Planococcus sp.*, (B) *K. aerogenes*, and (C) *E. avium*. 1-bromodecane is IS (RT = 23.09 – 23.13).

## Supplementary Table

**Table S1:** Other chemical compounds detected by GC/MS of EA-ME of *E. avium* and *K. aerogene* bacteria isolated respectively from ant *A. punicae* and Lacewing (*C. carnea*)

| Compounds                                                  | Origin                                                                                                                     | Biologic activities                                                                                                                                                                                                       | References |
|------------------------------------------------------------|----------------------------------------------------------------------------------------------------------------------------|---------------------------------------------------------------------------------------------------------------------------------------------------------------------------------------------------------------------------|------------|
| Di-(2-ethylhexyl) Phthalate (DEHP)                         | Synthetic materials<br>+<br>Bio-organisms, such as microbes, algae, plants                                                 | Plasticizer<br>+<br>anti-bacterial, larvicidal and cytotoxic<br>+<br>allelopathic, antimicrobial, insecticidal to improve the competitiveness of plants, and microorganisms to better adapt to biotic and abiotic stress. | [1-4]      |
| Mono(2-ethylhexyl) phthalate (MEHP)                        | Synthetic materials<br>+<br>Secondary metabolites of DEHP                                                                  | Plasticizer                                                                                                                                                                                                               | [5, 6]     |
| Didodecyl phthalate (DDDP)                                 | Synthetic materials<br>+<br>in the Environment                                                                             | In silico drug targeting agent<br>+<br>Phthalate Plasticizers                                                                                                                                                             | [7]        |
| Pregnane- 3,11,20,21-tetrol, cyclic 20,21-(butyl boronate) | Host plant<br>n-hexane fraction of <i>Phlomis stewartia</i><br><br><i>methanolic extract of</i> Epilobium angustifolium L. | Hormonal Compounds                                                                                                                                                                                                        | [8]<br>[9] |
| Acetamide, n-(p-methoxybenzyl)                             | Synthetic compound                                                                                                         | antimicrobial, anticancer, antioxidant, insecticidal against cowpea aphid and <i>Aphis craccivora</i> Koch (Homoptera: Aphididae)                                                                                         | [10, 11]   |

## References

1. Rajamanikyam, M., et al., *Isolation and characterization of phthalates from Brevibacterium mcbrellneri that cause cytotoxicity and cell cycle arrest*. Excli j, 2017. **16**: p. 375-387.
2. Lotfy, M.M., et al., *Di-(2-ethylhexyl) Phthalate, a major bioactive metabolite with antimicrobial and cytotoxic activity isolated from River Nile derived fungus Aspergillus awamori*. Beni-Suef University Journal of Basic and Applied Sciences, 2018. **7**(3): p. 263-269.
3. Huang, L., et al., *Phthalic Acid Esters: Natural Sources and Biological Activities*. Toxins (Basel), 2021. **13**(7).
4. Habib, M.R. and M.R. Karim, *Antimicrobial and Cytotoxic Activity of Di-(2-ethylhexyl) Phthalate and Anhydrosophoradiol-3-acetate Isolated from Calotropis gigantea (Linn.) Flower*. Mycobiology, 2009. **37**(1): p. 31-6.
5. Koch, H.M., R. Preuss, and J. Angerer, *Di(2-ethylhexyl)phthalate (DEHP): human metabolism and internal exposure – an update and latest results*<sup>1</sup>. International Journal of Andrology, 2006. **29**(1): p. 155-165.
6. Lan, K.-C., et al., *Plasticizer Di-(2-ethylhexyl) Phthalate and Its Metabolite Mono(2-ethylhexyl) Phthalate Inhibit Myogenesis in Differentiating Mouse and Human Skeletal Muscle Cell Models*. Applied Sciences, 2022. **12**(18): p. 9195.
7. Jananie, R.K., V. Priya, and K. Vijayalakshmi, *Secondary metabolites of Cynodon dactylon as an antagonist to angiotensin II type1 receptor: Novel in silico drug targeting approach for diabetic retinopathy*. J Pharmacol Pharmacother, 2012. **3**(1): p. 20-5.
8. Farooq, A., et al., *Evaluation of Antioxidant, Antimicrobial activity and GC-MS analysis of Phlomis stewartii*. Pure and Applied Biology, 2019. **8**: p. 2420-2433.
9. Sayik, A., et al., *DNA- Binding, Biological Activities and Chemical Composition of Wild Growing Epilobium angustifolium L. Extracts from Canakkale, Turkey*. Journal of the Turkish Chemical Society, Section A: Chemistry, 2017. **4**: p. 811-840.
10. Abdussalam-Mohammed, W., et al., *Biofabrication of Silver Nanoparticles Using Teucrium Apollinis Extract: Characterization, Stability, and Their Antibacterial Activities*. Chemistry, 2023. **5**(1): p. 54-64.
11. El-Dean, A., et al., *Synthesis and biological activity of 2-((3-Cyano-4,6-distyrylpyridin-2-yl) thio) acetamide and its cyclized form*. 2020. **1**: p. 46-50.
